# Supplementary material
Source: publisher figshare collection journal article supplement (https://frontiersin.figshare.com/ndownloader/files/12928469)

ORIGINAL SDS-PAGE GEL IMAGES

A. Silver-stained gel of cell-associated polysaccharide preparation. Presented as Figure 8A

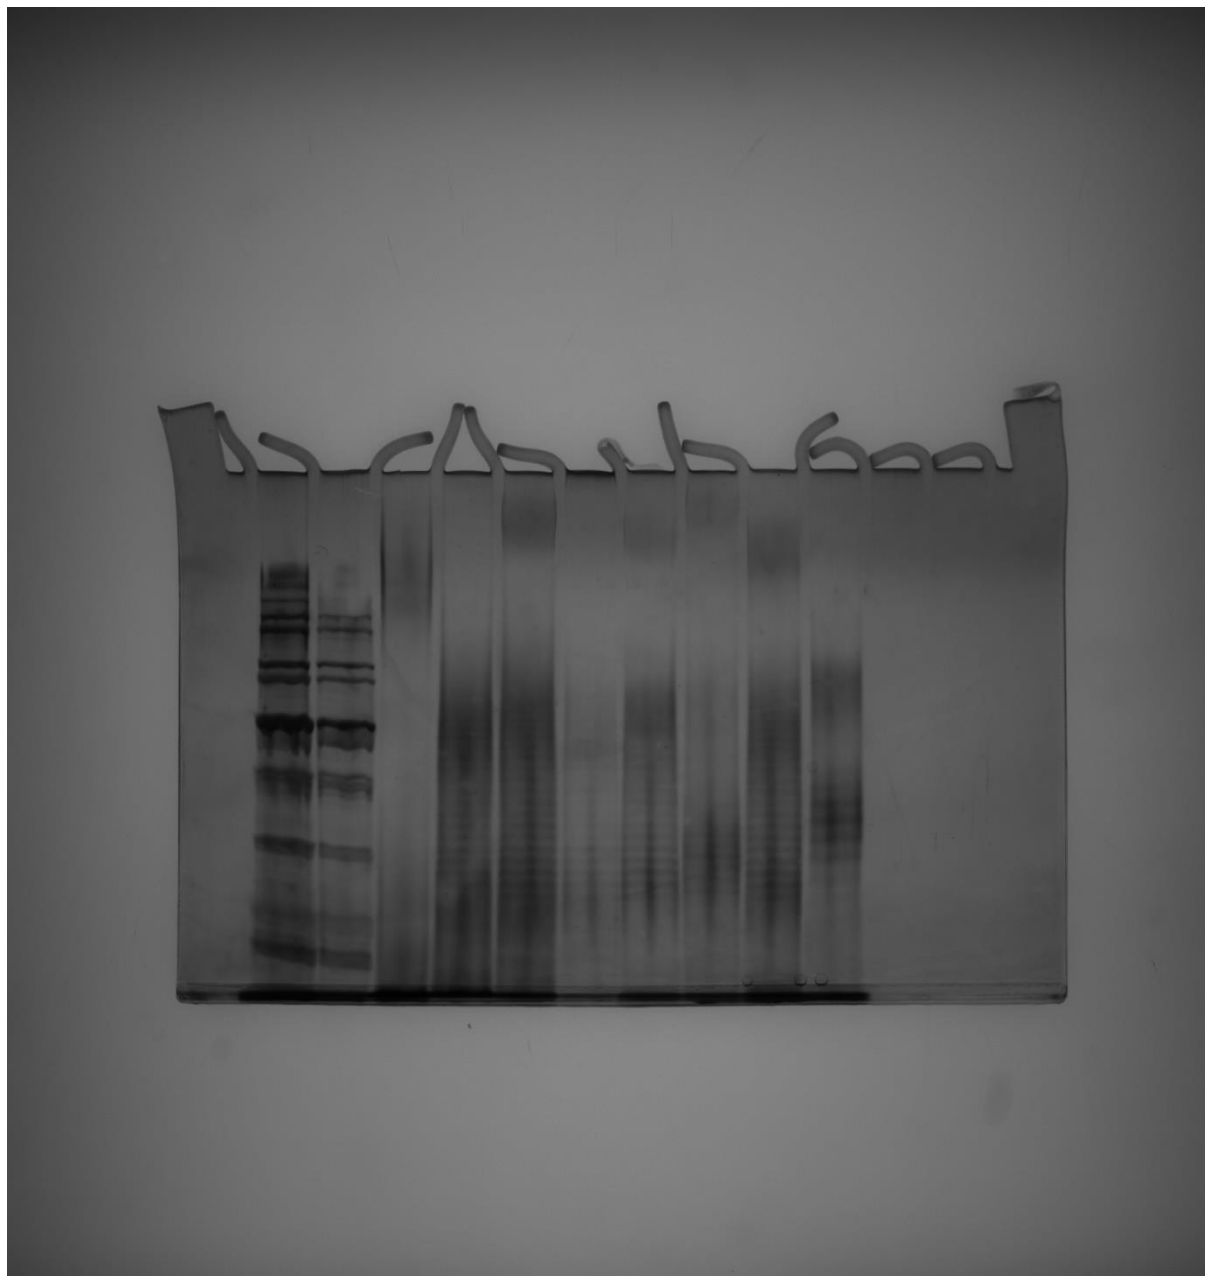

B. Alcian Blue-stained gel of cell-associated polysaccharide preparation. Presented as Figure 8B

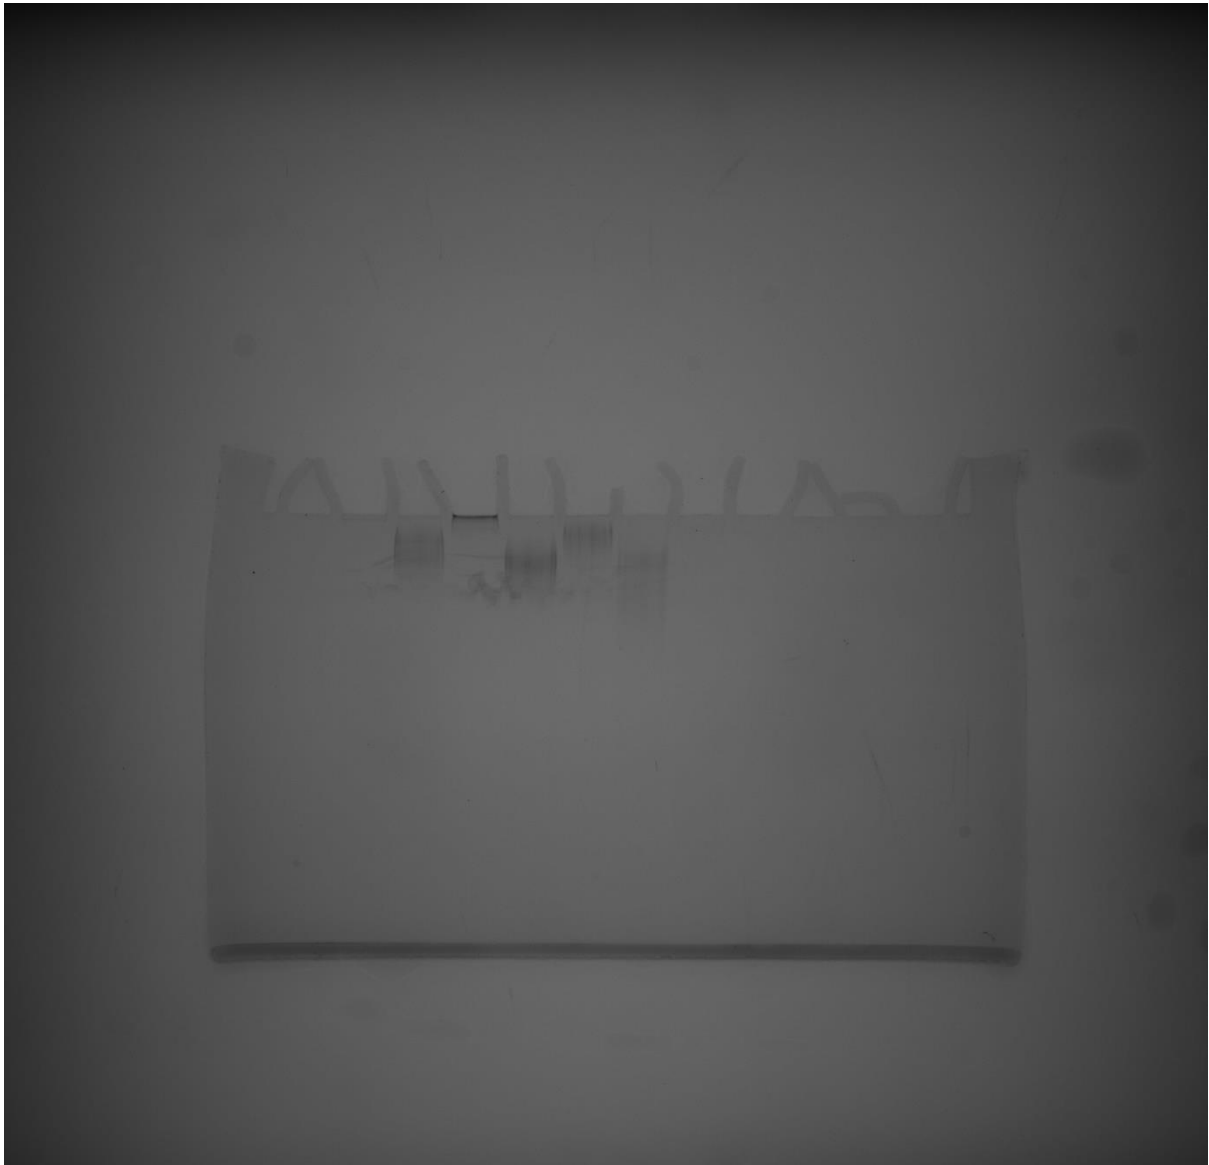

C. Silver-stained gel of extracellular polysaccharide preparation. Presented as Figure 8C

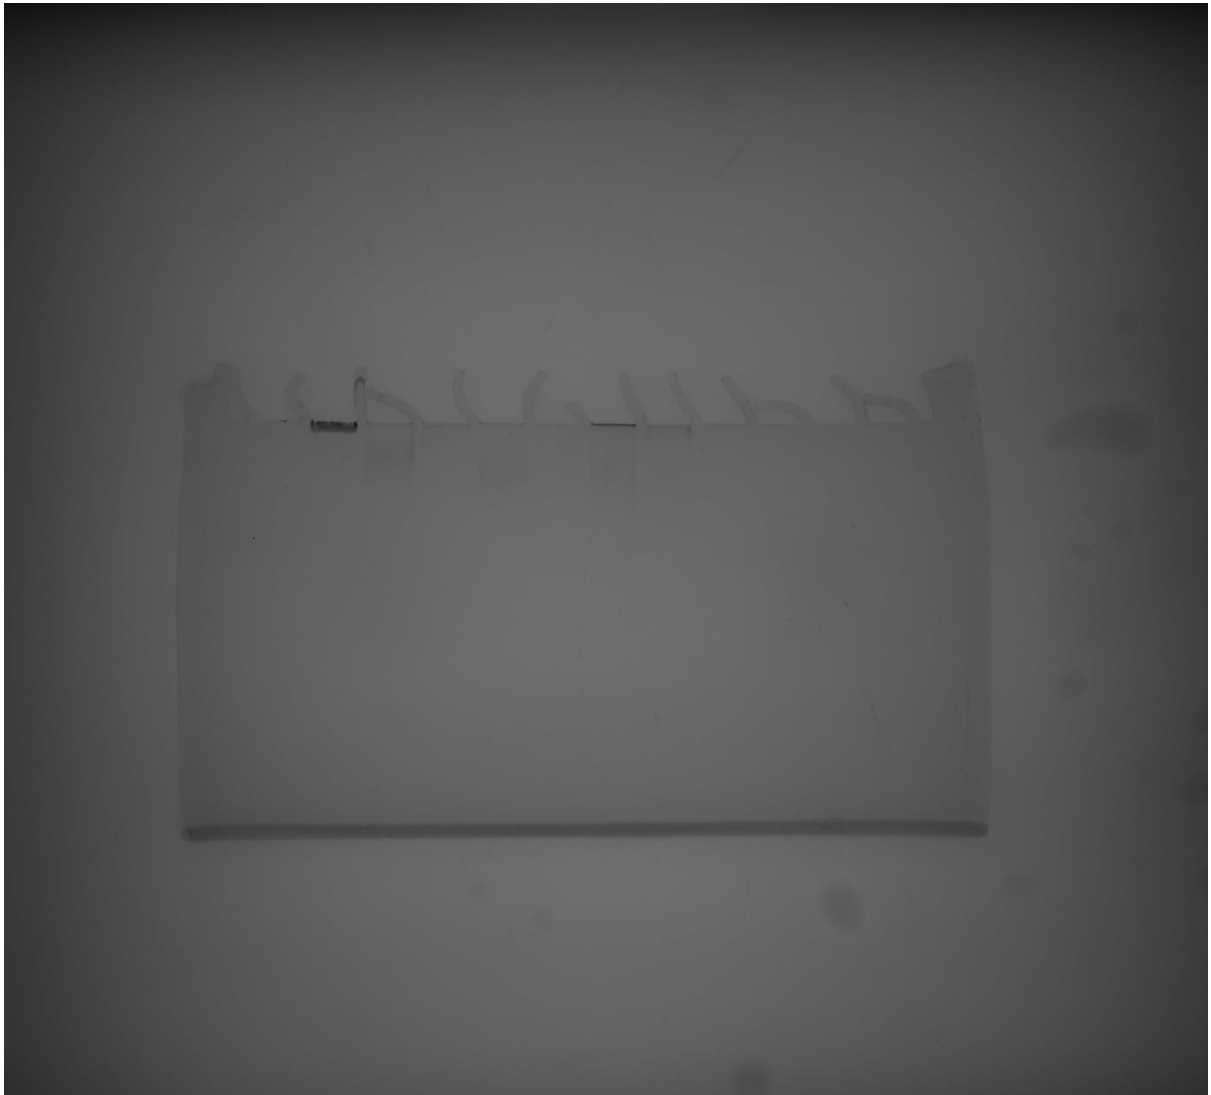

Supplement: Supplementary file [file 12928469]
